# Supplementary material for: Probiotics for the prevention of antibiotic-associated diarrhea and Clostridium difficile infection among hospitalized patients: systematic review and meta-analysis
Source: PubMed Central journal article supplement — Open Med. 2013 May 28;7(2):e56–67. (PMC3863752), 2013-05-28
Supplement: OpenMed-07-e56-s001.pdf [file OpenMed-07-e56-s001.pdf]

## Appendix A

### Search strategy

Literature searches were run using the OvidSP search platform in the following databases: MEDLINE, Embase, and Cochrane Central Register of Controlled Trials. We retrieved a total of 2011 references. All references were saved in an EndNote library, which was used to identify the 131 duplicates. We reviewed the remaining 1880 unique references against our inclusion criteria. The following tables record the search strategies and terms used.

#### MEDLINE

The search strategy for OvidSP MEDLINE (1946 to May Week 3 2012) retrieved 573 references. We used a combination of MeSH and free-text terms as follows:

| Set | History                                                                                                                                                                                                                                                                                                                                                                                                                                                                                                                                                                                                                                                                                                                                                                                             | Results   | Comments                                    |
|-----|-----------------------------------------------------------------------------------------------------------------------------------------------------------------------------------------------------------------------------------------------------------------------------------------------------------------------------------------------------------------------------------------------------------------------------------------------------------------------------------------------------------------------------------------------------------------------------------------------------------------------------------------------------------------------------------------------------------------------------------------------------------------------------------------------------|-----------|---------------------------------------------|
| 1   | Probiotics/ or probiotic*.mp.                                                                                                                                                                                                                                                                                                                                                                                                                                                                                                                                                                                                                                                                                                                                                                       | 338 752   | Probiotics terms                            |
| 2   | or exp Lactobacillaceae/ or exp Saccharomyces/ or exp Actinobacteria/<br>or exp Streptococcus/ or exp Clostridium/ or exp Bacillus/ and tu.fs.                                                                                                                                                                                                                                                                                                                                                                                                                                                                                                                                                                                                                                                      | 25 039    | Probiotics therapeutic use subheading terms |
| 3   | 1 or 2                                                                                                                                                                                                                                                                                                                                                                                                                                                                                                                                                                                                                                                                                                                                                                                              |           |                                             |
| 4   | Clostridium difficile/ or exp Diarrhea/ci, co, pc                                                                                                                                                                                                                                                                                                                                                                                                                                                                                                                                                                                                                                                                                                                                                   | 13 418    | C-difficile diarrhea terms                  |
| 5   | 3 and 4                                                                                                                                                                                                                                                                                                                                                                                                                                                                                                                                                                                                                                                                                                                                                                                             | 1 318     | Base clinical set terms                     |
| 6   | clinical trial.pt. or clinical trials as topic/ or clinical trial, phase i.pt. or<br>clinical trials, phase i as topic/ or clinical trial, phase ii.pt. or clinical<br>trials, phase ii as topic/ or clinical trial, phase iii.pt. or clinical trials,<br>phase iii as topic/ or clinical trial, phase iv.pt. or clinical trials, phase<br>iv as topic/ or controlled clinical trial.pt. or controlled clinical trials as<br>topic/ or meta analysis.pt. or meta analysis as topic/ or multicentre<br>study.pt. or multicenter studies as topic/ or randomized controlled<br>trial.pt. or randomized controlled trials as topic/ or ((clin: adj 5 trial:)<br>or ((singl: or doubl: or tripl: or trebl:)) and (mask: or blind:)),ti,ab. or<br>((random: adj5 trial:) or rct or rcts).ti,ab. (855826) | 855 826   | Clinical trials search filter               |
| 7   | 5 and 6                                                                                                                                                                                                                                                                                                                                                                                                                                                                                                                                                                                                                                                                                                                                                                                             | 280       | Trials results                              |
| 8   | (consensus development conference or consensus development<br>conference, nih or guideline or practice guideline).pt. or guideline/<br>or practice guideline/ or advance directive adherence/ or guideline<br>adherence/ or clinical protocols/ or antineoplastic protocols/ or<br>nursing process/ or patient care planning/ or advance care planning/<br>or advance directives/ or living wills/ or critical pathways/ or patient-<br>centered care/ or "consensus development conference".pt. or<br>(guideline: or (standard adj2 care) or consensus).mp.                                                                                                                                                                                                                                        | 378 065   | Guidelines quality filter                   |
| 9   | 7 and 8                                                                                                                                                                                                                                                                                                                                                                                                                                                                                                                                                                                                                                                                                                                                                                                             | 58        | Guideline results                           |
| 10  | cohort studies/ or longitudinal studies/ or follow-up studies/ or<br>prospective studies/ or case-control studies/ or retrospective studies/<br>or prognosis/ or disease-free survival/ or medical futility/ or pregnancy<br>outcome/ or treatment outcome/ or treatment failure/ or disease<br>progression/ or morbidity/ or incidence/ or prevalence/ or mortality/<br>or "cause of death"/ or child mortality/ or fatal outcome/ or fetal<br>mortality/ or hospital mortality/ or infant mortality/ or maternal<br>mortality/ or perinatal mortality/ or survival rate/ or survival analysis/<br>or disease-free survival/ or natural history.mp.                                                                                                                                                | 2 262 637 | Prognosis quality filter                    |
| 11  | 7 and 10                                                                                                                                                                                                                                                                                                                                                                                                                                                                                                                                                                                                                                                                                                                                                                                            | 467       | Prognosis results                           |
| 12  | 7 or 9 or 11                                                                                                                                                                                                                                                                                                                                                                                                                                                                                                                                                                                                                                                                                                                                                                                        | 654       | All study designs                           |
| 13  | limit 12 to ("adult (19 to 44 years)" or "middle aged (45 plus years)" or<br>"all aged (65 and over)" or "aged (80 and over)")                                                                                                                                                                                                                                                                                                                                                                                                                                                                                                                                                                                                                                                                      | 311       | Adult studies                               |
| 14  | limit 12 to "all child (0 to 18 years)"                                                                                                                                                                                                                                                                                                                                                                                                                                                                                                                                                                                                                                                                                                                                                             | 147       | Pediatric studies                           |
| 15  | 12 not (13 or 14)                                                                                                                                                                                                                                                                                                                                                                                                                                                                                                                                                                                                                                                                                                                                                                                   | 262       | Non-age-specified studies                   |
| 16  | 13 or 15                                                                                                                                                                                                                                                                                                                                                                                                                                                                                                                                                                                                                                                                                                                                                                                            | 573       | Final results                               |

## Appendix A continued

### Embase

The search strategy for OvidSP EMBASE (1980 to 2012 Week 21) retrieved 1185 references. We used a combination of Embase and free-text terms as follows:

| Set | History                                                                                                                                                                                                                                                                                                                                                                                                                                                                                                                                                                                                                                                                                                                                                                                                                                                                                                                                                                                                                                                                                                                                                                                                | Results   | Comments                      |
|-----|--------------------------------------------------------------------------------------------------------------------------------------------------------------------------------------------------------------------------------------------------------------------------------------------------------------------------------------------------------------------------------------------------------------------------------------------------------------------------------------------------------------------------------------------------------------------------------------------------------------------------------------------------------------------------------------------------------------------------------------------------------------------------------------------------------------------------------------------------------------------------------------------------------------------------------------------------------------------------------------------------------------------------------------------------------------------------------------------------------------------------------------------------------------------------------------------------------|-----------|-------------------------------|
| 1   | probiotic agent/ or probiotic*.mp. or lactobacillales/ or exp enterococcaceae/ or exp lactobacillaceae/ or exp streptococcaceae/ or exp saccharomycetales/ or exp Actinobacteria/ or exp Streptococcaceae/ or exp clostridia/ or exp bacilli/                                                                                                                                                                                                                                                                                                                                                                                                                                                                                                                                                                                                                                                                                                                                                                                                                                                                                                                                                          | 575 874   | Probiotics terms              |
| 2   | Clostridium difficile/ or diarrhea/ or acute diarrhea/ or bloody diarrhea/ or chronic diarrhea/ or infectious diarrhea/ /                                                                                                                                                                                                                                                                                                                                                                                                                                                                                                                                                                                                                                                                                                                                                                                                                                                                                                                                                                                                                                                                              | 138 527   | C-difficile diarrhea terms    |
| 3   | 1 and 2                                                                                                                                                                                                                                                                                                                                                                                                                                                                                                                                                                                                                                                                                                                                                                                                                                                                                                                                                                                                                                                                                                                                                                                                | 14 860    | Base clinical set terms       |
| 4   | ct.fs. or clinical trial/ or phase 1 clinical trial/ or phase 2 clinical trial/ or phase 3 clinical trial/ or phase 4 clinical trial/ or controlled clinical trial/ or meta analysis/ or multicenter study/ or randomized controlled trial/ or outcomes research/ or ((clin adj10 trial:) or ((singl: or doubl: or tripl: or trebl:) and (random: or blind: or mask:)) or (sham or placebo: or multicenter: or multicentre: or metaanalys:) or (meta adj2 analys:)). mp.)                                                                                                                                                                                                                                                                                                                                                                                                                                                                                                                                                                                                                                                                                                                              | 1 225 354 | Clinical trials search filter |
| 5   | 3 and 4                                                                                                                                                                                                                                                                                                                                                                                                                                                                                                                                                                                                                                                                                                                                                                                                                                                                                                                                                                                                                                                                                                                                                                                                | 3 030     | Trials results                |
| 6   | practice guideline/ or consensus development/ or good clinical practice/ or nursing care plan/ or clinical pathway/ or (guideline: or (standard adj2 care) or consensus).mp.                                                                                                                                                                                                                                                                                                                                                                                                                                                                                                                                                                                                                                                                                                                                                                                                                                                                                                                                                                                                                           | 452 501   | Guidelines quality filter     |
| 7   | 3 and 6                                                                                                                                                                                                                                                                                                                                                                                                                                                                                                                                                                                                                                                                                                                                                                                                                                                                                                                                                                                                                                                                                                                                                                                                | 699       | Guideline results             |
| 8   | cohort analysis/ or longitudinal study/ or prospective study/ or case control study/ or hospital based case control study/ or population based case control study/ or retrospective study/ or cancer recurrence/ or cancer regression/ or cancer relapse/ or disease duration/ or disease exacerbation/ or prognosis/ or recurrent disease/ or reinfection/ or relapse/ or remission/ or tumor recurrence/ or tumor regression/ or survival/ or cancer survival/ or disease free survival/ or overall survival/ or survival rate/ or survival time/ or incidence/ or cancer incidence/ or familial incidence/ or morbidity/ or maternal morbidity/ or perinatal morbidity/ or newborn morbidity/ or mortality/ or cancer mortality/ or childhood mortality/ or embryo mortality/ or fetus mortality/ or infant mortality/ or maternal mortality/ or prenatal mortality/ or surgical mortality/ or perinatal mortality/ or newborn mortality/ or death/ or "cause of death"/ or dying/ or heart death/ or sudden death/ or child death/ or newborn death/ or prevalence/ or treatment outcome/ or disease free interval/ or treatment failure/ or drug treatment failure/ or (natural adj2 history).mp. | 2 841 321 | Prognosis quality filter      |
| 9   | 3 and 8                                                                                                                                                                                                                                                                                                                                                                                                                                                                                                                                                                                                                                                                                                                                                                                                                                                                                                                                                                                                                                                                                                                                                                                                | 786       | Prognosis results             |
| 10  | 5 or 7 or 9                                                                                                                                                                                                                                                                                                                                                                                                                                                                                                                                                                                                                                                                                                                                                                                                                                                                                                                                                                                                                                                                                                                                                                                            | 4 089     | All study designs             |
| 11  | limit 46 to (adult <18 to 64 years> or aged <65+ years>)                                                                                                                                                                                                                                                                                                                                                                                                                                                                                                                                                                                                                                                                                                                                                                                                                                                                                                                                                                                                                                                                                                                                               | 1 185     | Adult studies - final results |

### Evidenced-based medicine reviews: Cochrane Central Register of Controlled Trials

The search strategy for OvidSP EBM Reviews - CCTR (May 2012) retrieved 253 references. This database consists exclusively of RCTs; no study design terms were used. We used a combination of primarily MeSH and free-text terms as follows:

| Set | History                                                                                                                                                        | Results | Comments                   |
|-----|----------------------------------------------------------------------------------------------------------------------------------------------------------------|---------|----------------------------|
| 1   | Probiotics/ or probiotic*.mp. or exp Lactobacillaceae/ or exp Saccharomyces/ or exp Actinobacteria/ or exp Streptococcus/ or exp Clostridium/ or exp Bacillus/ | 3414    | Probiotics terms           |
| 2   | Clostridium difficile/ or exp Diarrhea/                                                                                                                        | 2140    | C-difficile diarrhea terms |
| 3   | 1 and 2                                                                                                                                                        | 253     | Final set                  |
