# Supplementary material for: Probiotics for the prevention of antibiotic-associated diarrhea and Clostridium difficile infection among hospitalized patients: systematic review and meta-analysis
Source: PubMed Central journal article supplement — Open Med. 2013 May 28;7(2):e56–67. (PMC3863752), 2013-05-28
Supplement: OpenMed-07-e56-s002.pdf [file OpenMed-07-e56-s002.pdf]

## Appendix B

### Criteria for evaluating the quality of randomized controlled trials, according to the US Preventive Services Task Force<sup>12</sup>

| Quality rating | Criteria                                                                                                                                                                                                                                                                                                                                                                                                                                                                                                                                                                                                                                                                                                                                                  |
|----------------|-----------------------------------------------------------------------------------------------------------------------------------------------------------------------------------------------------------------------------------------------------------------------------------------------------------------------------------------------------------------------------------------------------------------------------------------------------------------------------------------------------------------------------------------------------------------------------------------------------------------------------------------------------------------------------------------------------------------------------------------------------------|
| Good           | All of the following criteria must be met for a study to merit a “good” grading: <ul style="list-style-type: none"><li>• Intervention and control groups were comparable</li><li>• Comparable groups were maintained over the study, with follow-up available for a minimum of 80%</li><li>• Interventions were clearly defined</li><li>• Valid and reliable measurement instruments were used and were applied equally to both groups</li><li>• Outcome was clearly defined and measurable, and all relevant outcomes were considered</li><li>• Researchers were blinded to intervention allocation</li><li>• Intention-to-treat analysis was employed, if applicable</li><li>• There was appropriate attention to confounders in the analysis</li></ul> |
| Fair           | The presence of any of the following criteria will result in a “fair” grading: <ul style="list-style-type: none"><li>• Minor differences between the intervention and control groups were identified, or group demographic characteristics were not reported</li><li>• Intervention was clearly defined but was not measurable (e.g., administration of probiotic without documentation of dose)</li><li>• Outcome was clearly defined but was not measurable (e.g., presence of diarrhea, with no explicit definition)</li><li>• No difference was detected (a negative study) but study had insufficient power</li></ul>                                                                                                                                |
| Poor           | The presence of any of the following fatal flaws will result in a “poor” grading: <ul style="list-style-type: none"><li>• There were major differences between the intervention and control groups</li><li>• There was significant loss to follow-up (&gt; 20%)</li><li>• Interventions were not clearly defined</li><li>• Outcomes were not clearly defined (e.g., gastrointestinal symptoms without specification)</li><li>• Major confounders were not accounted for</li></ul>                                                                                                                                                                                                                                                                         |
